# Supplementary material for: Apolipoprotein-CIII O-Glycosylation Is Associated with Micro- and Macrovascular Complications of Type 2 Diabetes
Source: MDPI journal article supplement (doi:10.3390/ijms25105365), 2024-05-14
Supplement: s1 [file s1]

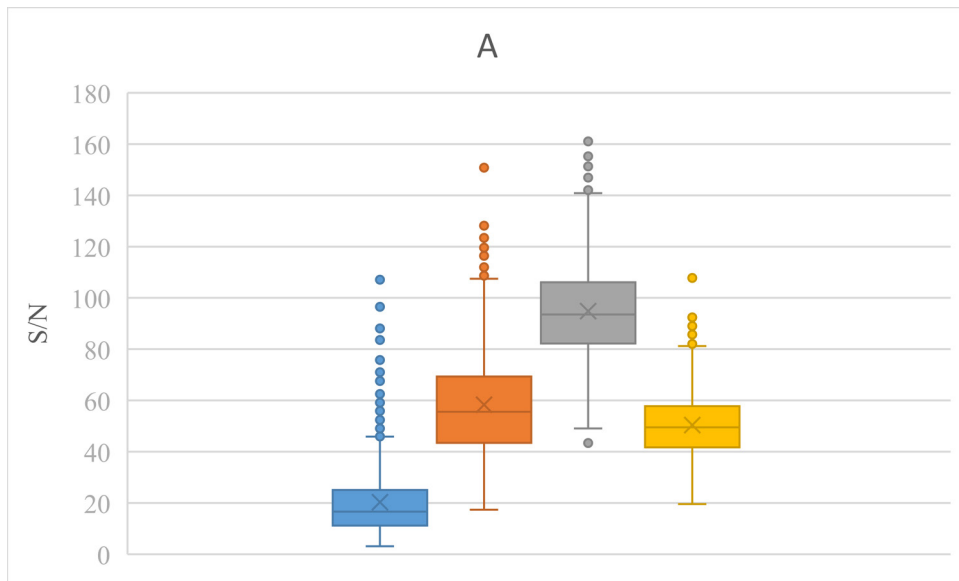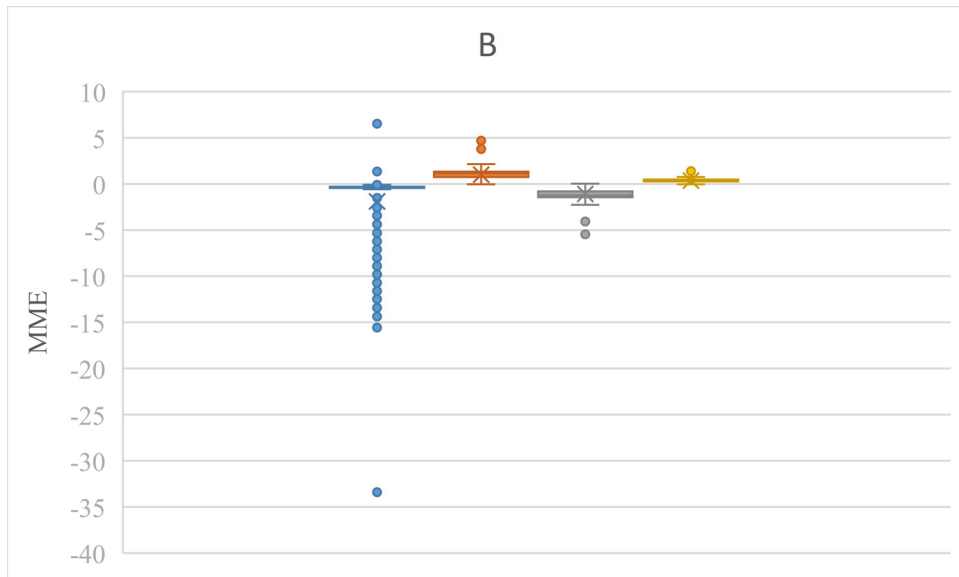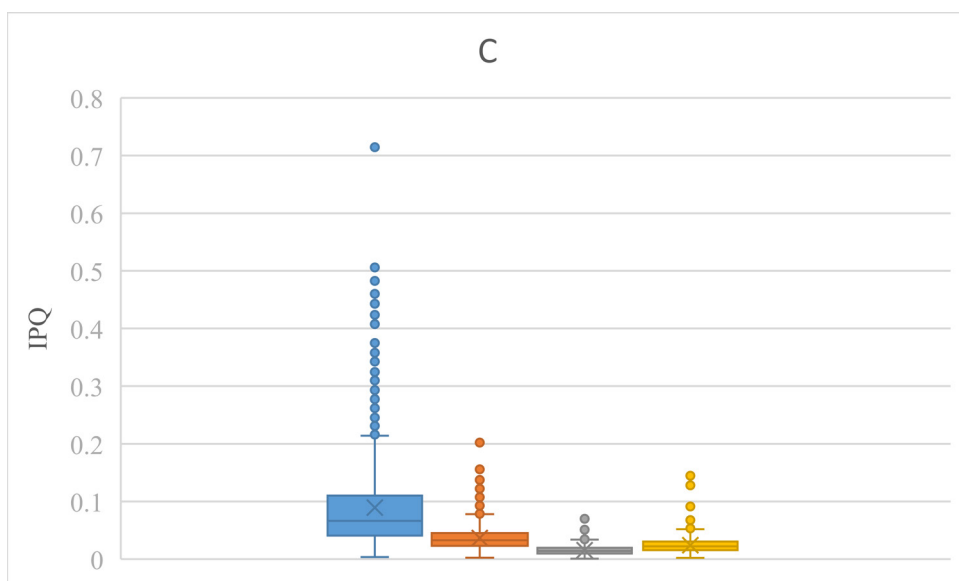

**Figure S1.** Distributions of quality control parameters S/N (panel A), MME (panel B) and IPQ (panel C) for apo-CIII glycoforms in 1571 DiaGene samples.

S/N: signal-to-noise ratio; MME: mass measurement error; IPQ: isotopic quality pattern. Blue = apo-CIII<sub>0a</sub>; orange = apo-CIII<sub>0c</sub>; gray = apo-CIII<sub>1</sub>; yellow = apo-CIII<sub>2</sub>.
